# Supplementary material
Source: PubMed Central journal article supplement (PMC2645657)
Supplement: NIHMS92945-supplement-2.pdf [file NIHMS92945-supplement-2.pdf]

## **Iron-binding properties of plant phenolics and cranberry's bio-effects**

Maolin Guo\*, Carlos Perez, Yibin Wei, Elise Rapoza, Gregory Su

Department of Chemistry and Biochemistry, University of Massachusetts, Dartmouth,

MA 02747

Fadi Bou-Abdallah and N. D. Chasteen

Department of Chemistry, University of New Hampshire Durham, NH 03824-3598, USA

### **Supporting information**

#### **S1. Apparent binding constant equations**

#### **Figs. S1-S8**

**S1. Apparent binding constants:**

Estimation of the apparent binding constants for the formation of the flavonoid-Fe<sup>2+</sup> complexes can be made as follows.<sup>1</sup>

**a) For the ligand-substrate reaction with formation of 1:1 complex LS:**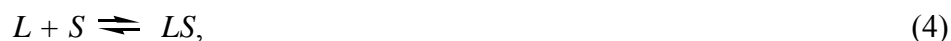

where  $L$  = flavonoid,  $S = \text{Fe}^{2+}$ , and  $LS$  = flavonoid-Fe<sup>2+</sup> complex, the equilibrium constant (apparent binding constant) is given by:

$$K = \frac{[LS]_e}{[L]_e[S]_e} \quad (5)$$

The subscript  $e$  designates equilibrium concentrations. The ratios of the equilibrium  $LS$  complex concentration,  $[LS]_e$ , and the initial  $L$  concentration,  $[L]_o$ , can be derived from the absorbance of the solutions at a chosen wavelength both at equilibrium and far from equilibrium. The result of the derivation is as follows:

$$F_c = \frac{A_u - A_m}{A_u - A_c} = \frac{[LS]_e}{[L]_o} \quad (6)$$

where  $F_c$  is the fraction of  $L$  which formed a complex, the subscripts  $e$  and  $o$  stand for equilibrium and initial concentrations, respectively.  $A_u$ ;  $A_m$ ; and  $A_c$  are the absorbance (at a chosen wavelength) of solutions of  $L$  only (before Fe<sup>2+</sup> was added);  $L$  and  $LS$  mixture (somewhere in the middle of titration); and  $LS$  only (at the end of titration) respectively.

The concentration of free Fe<sup>2+</sup> at equilibrium  $[S]_e$  is derived from:

$$[S]_e = [S]_o - [LS]_e = [S]_o - F_c[L]_o \quad (7)$$

The apparent binding constant  $K$  can then be calculated from Eqs. (6), (7), and (8):

---

<sup>1</sup> E. Ojadi, Ph.D. Thesis, 1986, Brandeis University, Boston, MA, USA

$$K = \frac{F_c}{1 - F_c} \times \frac{1}{[S]_e} \quad (8)$$

**b) For the ligand-substrate reaction with formation of 2:1 complex  $SL_2$ , the following equations apply:**

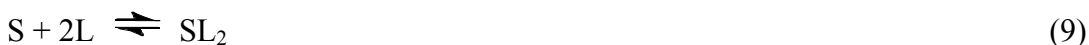

$$K = \frac{[SL_2]_e}{[S]_e [L]_e^2} \quad (10)$$

$$t = 0, A_u = \varepsilon_L \ell [L]_o, [S]_o = 0, [SL_2]_o = 0 \quad (11)$$

$$t = \infty, A_c = \varepsilon_c \ell [SL_2]_\infty = \frac{\varepsilon_c \ell [L]_o}{2} \quad (12)$$

$$t = t, A_m = \varepsilon_L \ell [L]_e + \varepsilon_c \ell [SL_2]_e \quad (13)$$

$$[L]_o = [L]_e + 2[SL_2]_e \quad (14)$$

$$[L]_e = [L]_o - 2[SL_2]_e \quad (15)$$

$$F_c = \frac{A_u - A_m}{A_u - A_c} \quad (16)$$

$$F_c = \frac{\varepsilon_L \ell [L]_o - \varepsilon_L \ell [L]_e - \varepsilon_c \ell [SL_2]_e}{\varepsilon_L \ell [L]_o - \frac{\varepsilon_c \ell [L]_o}{2}} \quad (17)$$

$$F_c = \frac{2[SL_2]_e}{[L]_o} \quad (18)$$

$$K = \frac{\frac{F_c}{[L]_o}}{2[S]_e \left( \frac{[L]_o - 2[SL_2]_e}{[L]_o} \right)^2} \quad (19)$$

$$[S]_e = [S]_o - [SL_2]_e \quad (20)$$

$$[S]_e = [S]_o - F_c[L]_o \quad (21)$$

$$K = \frac{F_c}{2[L]_o[S]_e(1 - F_c)^2} \quad (22)$$

A

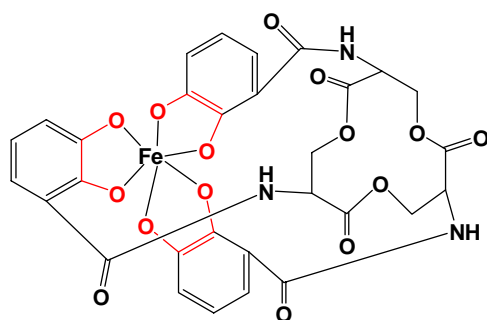

B

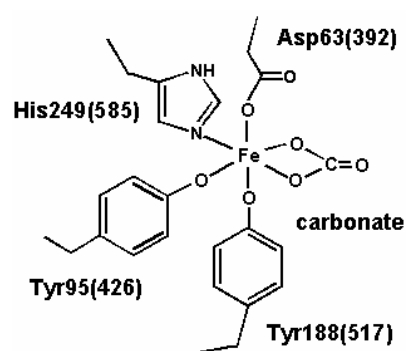

**Fig. S1** The chemical structures of the "Fe-binding motif" in (A) enterobactin (a bacterial siderophore), and (B) Fe-binding site in transferrin.

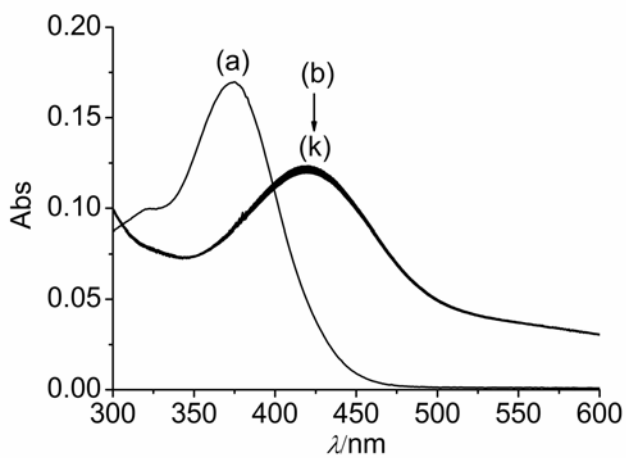

**Fig. S2** UV/Vis spectra of quercetin and the kinetics after the addition of 1.0 mol eq.  $\text{Fe}^{2+}$  in 20 mM KPB buffer, pH 7.2. (a), quercetin (10  $\mu\text{M}$ ), (b) 30 s after the addition of 1 mol eq.  $\text{Fe}^{2+}$ , (c) – (l), 1 – 10 min after the addition of  $\text{Fe}^{2+}$ .

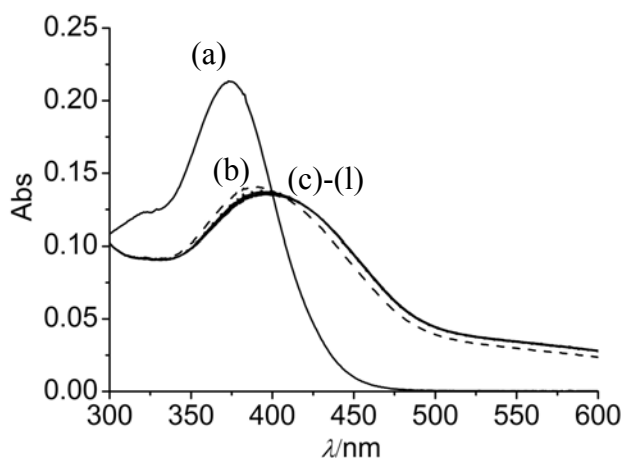

**Fig. S3** UV/Vis spectra of quercetin and the kinetics after the addition of 0.5 mol eq.  $\text{Fe}^{2+}$  in 20 mM KPB buffer, pH 7.2. (a), quercetin (12  $\mu\text{M}$ ), (b) 30 s after the addition of  $\text{Fe}^{2+}$ , (c) – (l), 1 – 10 min after the addition of  $\text{Fe}^{2+}$ .

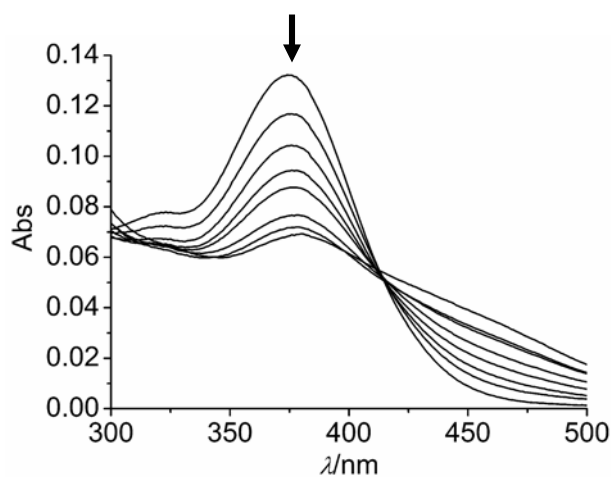

**Fig. S4** Titration of quercetin by  $\text{Ga}^{3+}$  in 20 mM KPB buffer, pH 7.2. From top to bottom: 8  $\mu\text{M}$  quercetin in the presence of 0, 0.25, 0.5, 0.75, 1.0, 1.5, 2.0, and 3.0 mol eq.  $\text{Ga}^{3+}$ .

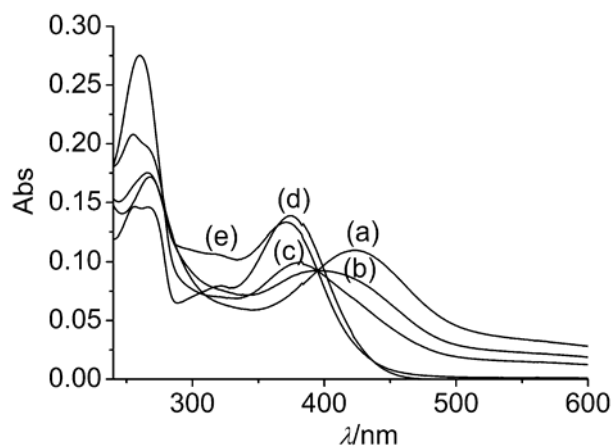

**Fig. S5** Recovery of  $\text{Fe}^{2+}$  from ATP, citrate or EDTA by quercetin in 20 mM KPB, pH 7.2. (a) 10  $\mu\text{M}$  quercetin- $\text{Fe}^{2+}$ ; (b) recovery from 10  $\mu\text{M}$  citrate, (c) recovery from 10  $\mu\text{M}$  ATP (d) recovery from 10  $\mu\text{M}$  EDTA and (e) free 10  $\mu\text{M}$  quercetin.

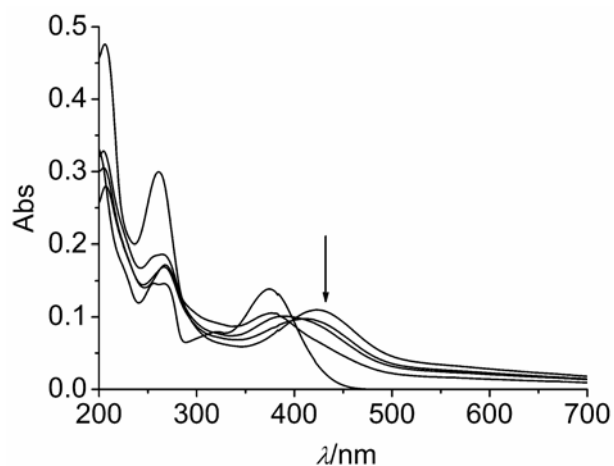

**Fig. S6** UV/Vis spectroscopy of the recovery of  $\text{Fe}^{2+}$  from quercetin by ATP, citrate, and EDTA in KPB at pH 7.2. All the chelators were 10  $\mu\text{M}$ . From top to bottom: quercetin- $\text{Fe}^{2+}$ , with citrate, with ATP, with EDTA and quercetin alone, respectively.

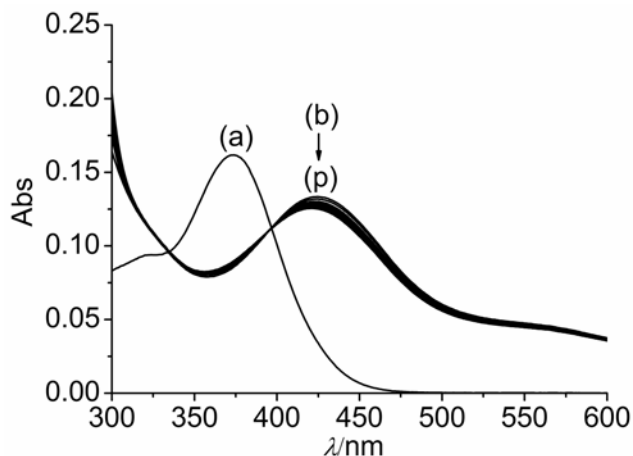

**Fig. S7** UV/Vis spectra of quercetin and Fe<sup>2+</sup> in the presence of H<sub>2</sub>O<sub>2</sub> and ascorbate in 20 mM KPB, pH 7.2. (a) 10 μM quercetin only; (b) with the addition of 10 μM Fe<sup>2+</sup>; and (c)-(p) 100 μM ascorbic acid and 200 μM H<sub>2</sub>O<sub>2</sub> were added and the kinetics was monitored for 10 min (from top to bottom).

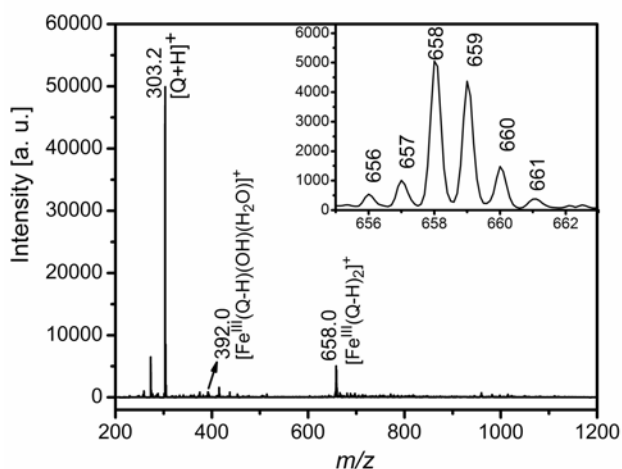

**Fig. S8** Electrospray mass spectrum after addition of 20 μM of H<sub>2</sub>O<sub>2</sub> to a solution of quercetin and Fe<sup>2+</sup> (10 μM each, 1:1) in methanol/water (1/1, v/v). The inset is the isotopic pattern of the peak at  $m/z = 658.0$ .

After the addition of H<sub>2</sub>O<sub>2</sub>, the peaks for quercetin-Fe<sup>2+</sup> complexes ( $m/z$  375.1, 659.0, 712.9 and 1014.8) diminished, but peaks for quercetin-Fe<sup>3+</sup> complexes ( $m/z$  658.0 and 392.0) appeared. The overall ESI-Mass spectrum after the addition of H<sub>2</sub>O<sub>2</sub> is almost identical to that of the mixture of quercetin (10 μM) and Fe<sup>3+</sup> (10 μM) under similar conditions. This result suggests the conversion of Fe<sup>2+</sup>-quercetin complexes to Fe<sup>3+</sup>-quercetin complexes by H<sub>2</sub>O<sub>2</sub> without Fenton chemistry.
